# Supplementary material for: Antibiotic Use and Fatal Outcomes among Critically Ill Patients with COVID-19 in Tacna, Peru
Source: MDPI journal article supplement (doi:10.3390/antibiotics10080959), 2021-08-09
Supplement: s1 [file s1]

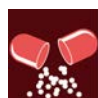

## Supplementary Materials:

## Article

# Antibiotic Use and Fatal Outcomes among Critically Ill Patients with COVID-19 in Tacna, Peru

Cesar Copaja-Corzo <sup>1</sup>, Miguel Hueda-Zavaleta <sup>1,2,\*</sup>, Vicente A. Benites-Zapata <sup>3</sup> and Alfonso J. Rodriguez-Morales <sup>4,5,\*</sup>

<sup>1</sup> Faculty of Health Sciences, Universidad Privada de Tacna, Tacna 23003, Peru; cescopajac@upt.pe

<sup>2</sup> Hospital III Daniel Alcides Carrión EsSalud, Tacna 23000, Peru

<sup>3</sup> Universidad San Ignacio de Loyola, Unidad de Investigación para la Generación y Síntesis de Evidencias en Salud, Lima 15024, Peru; vbenites@usil.edu.pe

<sup>4</sup> Masters of Clinical Epidemiology and Biostatistics, Universidad Científica del Sur, Lima 15046, Peru

<sup>5</sup> Grupo de Investigación Biomedicina, Faculty of Medicine, Fundación Universitaria Autónoma de las Américas, Belmonte, Pereira, Risaralda 660003, Colombia

\* Correspondence: miguel.hueda@essalud.gob.pe (M.H.-Z.); arodriguezmo@cientifica.edu.pe (A.J.R.-M.)

**Table S1.** Pathogens found in the cultures of the study population.

| Antibiotic                          | Total (n = 50) | VAP (n = 37) | CAB (n = 10) | CAUTI (n = 3) |
|-------------------------------------|----------------|--------------|--------------|---------------|
| <i>Acinetobacter baumannii</i>      | 27 (54)        | 25 (67.57)   | 2 (20)       | 0 (0)         |
| <i>Pseudomonas aeruginosa</i>       | 11 (22)        | 7 (18.92)    | 1 (10)       | 3 (100)       |
| <i>Staphylococcus epidermidis</i>   | 3 (6)          | 0 (0)        | 3 (30)       | 0 (0)         |
| <i>Klebsiella pneumoniae</i>        | 4 (8)          | 3 (8.11)     | 1 (10)       | 0 (0)         |
| <i>Stenotrophomonas maltophilia</i> | 2 (4)          | 1 (2.7)      | 1 (10)       | 0 (0)         |
| <i>Klebsiella oxytoca</i>           | 1 (2)          | 1 (2.7)      | 0            | 0 (0)         |
| <i>Enterococcus faecalis</i>        | 1 (2)          | 0 (0)        | 1 (10)       | 0 (0)         |
| <i>Staphylococcus haemolyticus</i>  | 1 (2)          | 0(0)         | 1 (10)       | 0 (0)         |

VAP: Ventilator-associated pneumonia, CAB: Catheter-associated bacteremia, CAUTI: Catheter-associated urinary tract infection.

**Table S2.** Description of the antibiotic resistance profile of *Acinetobacter Baumannii* present in the study cultures (n = 27).

| Antibiotic           | Susceptible, n (%) | Resistant, n (%) | Intermediate. n (%) |
|----------------------|--------------------|------------------|---------------------|
| Amikacin             | 2 (7.41)           | 25 (92.59)       | 0 (0)               |
| Ampicillin/Sulbactam | 9 (33.33)          | 7 (25.93)        | 11 (40.74)          |
| Cefepime             | 3 (11.11)          | 24 (88.89)       | 0 (0)               |
| Ceftazidime          | 1 (3.70)           | 22 (81.48)       | 4 (14.81)           |
| Ciprofloxacin        | 1 (3.70)           | 26 (96.30)       | 0 (0)               |
| Gentamicin           | 1 (3.70)           | 26 (96.30)       | 0 (0)               |
| Imipenem             | 1 (3.70)           | 26 (96.30)       | 0 (0)               |
| Levofloxacin         | 1 (3.70)           | 26 (96.30)       | 0 (0)               |
| Meropenem            | 1 (3.70)           | 26 (96.30)       | 0 (0)               |
| Tobramycin           | 2 (7.41)           | 25 (92.59)       | 0 (0)               |

**Table S3.** Description of the antibiotic resistance profile of *Pseudomonas aeruginosa* present in the study cultures (*n* = 11).

| <b>Antibiotic</b>       | <b>Susceptible, <i>n</i> (%)</b> | <b>Resistant, <i>n</i> (%)</b> | <b>Intermediate, <i>n</i> (%)</b> |
|-------------------------|----------------------------------|--------------------------------|-----------------------------------|
| Amikacin                | 0 (0)                            | 11 (100)                       | 0 (0)                             |
| Aztreonam               | 1 (9.09)                         | 10 (90.91)                     | 0 (0)                             |
| Cefepime                | 0 (0)                            | 11 (100)                       | 0 (0)                             |
| Ceftazidime             | 0 (0)                            | 11 (100)                       | 0 (0)                             |
| Ciprofloxacin           | 0 (0)                            | 11 (100)                       | 0 (0)                             |
| Colistin                | 11 (100)                         | 0 (0)                          | 0 (0)                             |
| Gentamicin              | 0 (0)                            | 10 (90.91)                     | 1 (9.09)                          |
| Imipenem                | 0 (0)                            | 11 (100)                       | 0 (0)                             |
| Levofloxacin            | 0 (0)                            | 11 (100)                       | 0 (0)                             |
| Meropenem               | 0 (0)                            | 11 (100)                       | 0 (0)                             |
| Piperacillin/Tazobactam | 7 (63.64)                        | 1 (9.09)                       | 3 (27.27)                         |
| Tobramycin              | 0 (0)                            | 7 (100)                        | 0 (0)                             |
